# Supplementary material for: Regulation of two germin-like protein genes during plum fruit development
Source: PubMed Central journal article supplement — J Exp Bot. 2010 Mar 4;61(6):1761–70. doi: 10.1093/jxb/erq043 (PMC2852666; doi:10.1093/jxb/erq043), 2010-03-04
Supplement: erq043_1.pdf [file erq043_1.pdf]

### **Supplementary Online material**

Regulation of two germin-like protein genes during plum fruit development.

El-Sharkawy I<sup>1</sup>, Mila I<sup>3</sup>, Bouzayen M<sup>3</sup>, Jayasankar S<sup>2\*</sup>.

**\*Corresponding author:** Dr. Jayasankar Subramanian.

**Address:** <sup>2</sup>University of Guelph, Department of Plant Agriculture. 4890 Victoria Av. N.,

P.O. Box 7000 Vineland Station, ON, L0R 2E0 Canada.

**E-mail:** [jsubrama@uoguelph.ca](mailto:jsubrama@uoguelph.ca)

**This PDF file includes:**

- Supplementary figures and figure legends online.

## Auxin-related genes in plum

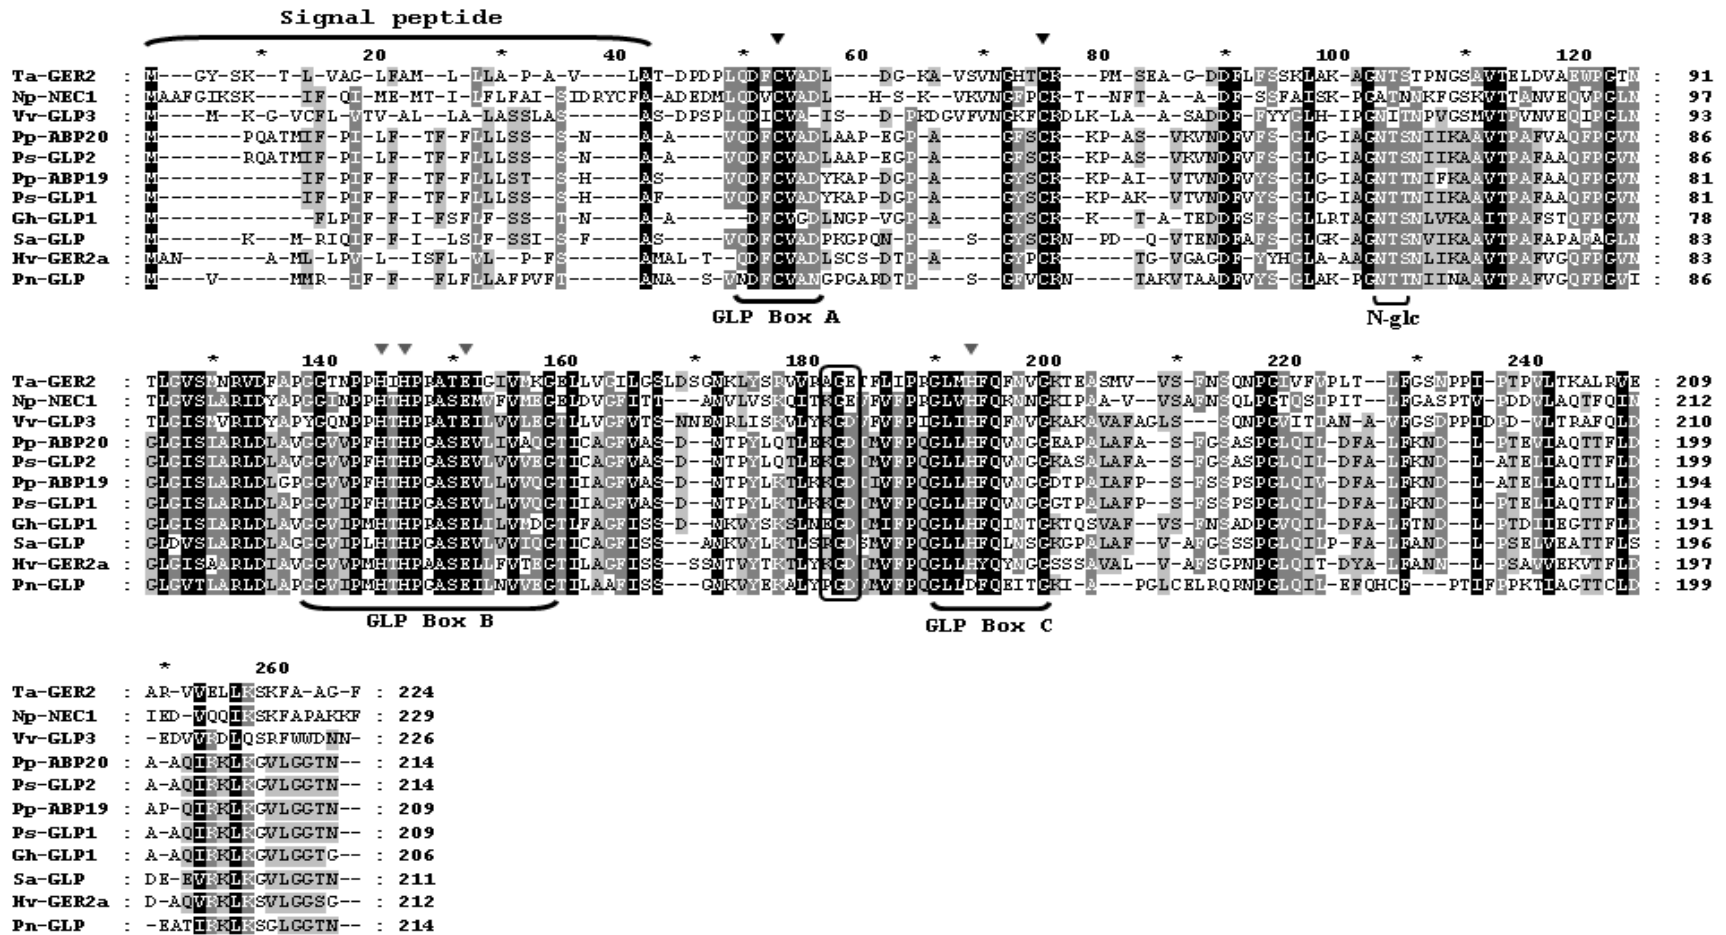

**Supplementary Fig.1 online.** Amino acid sequence alignment of the *P. salicina* genes, Ps-GLP1 and Ps-GLP2 with closely related sequences *P. persica* Pp-ABP19, Pp-ABP20, *G. hirsutum* Gh-GLP1, *S. alba* Sa-GLP, *H. vulgare* Hv-GER2a, *I. nil* Pn-GLP, *N. plumbaginifolia* Np-NEC1, *V. vinifera* Vv-GLP3, and *T. aestivum* Ta-GER2, using ClustalX program. Conserved residues are shaded in black. Dark grey shading indicates similar residues in nine out of eleven of the sequences and clear grey shading indicates similar residues in eight out of eleven of the sequences. Putative N-terminal signal sequences are indicated by "Signal peptide". The three conserved germin/GLP motifs are signed GLP Box A, B, and C (Bernier and Berna, 2001). The conserved two cysteine residues are pointed with two black arrows. The three histidines and the glutamate amino acid residues involved in metal binding are pointed with four gray arrows. The predicted N-glycosylation sites of Ps-GLP sequences are indicated by "N-glc". RGD-like tripeptides (KGD) is outlined.

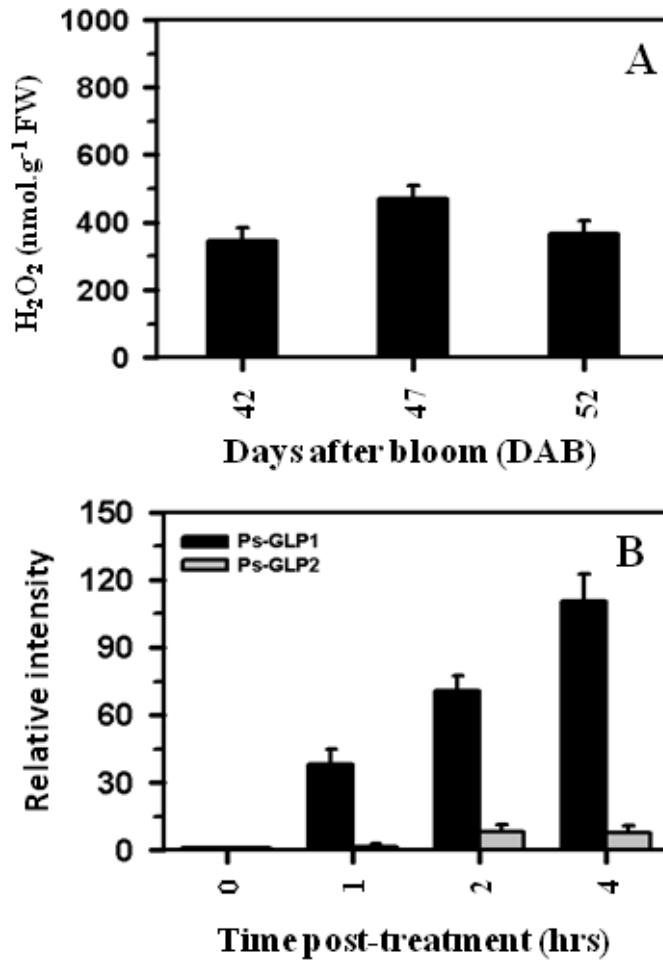

**Supplementary Fig.2 online.** [A] The evolution of H<sub>2</sub>O<sub>2</sub> levels during stage 2 of fruit development using the whole fruit. The experiments were carried out in triplicate. The x-axis represents the developmental stage indicated by number of days after bloom (DAB). The y-axis represents the concentration of detected H<sub>2</sub>O<sub>2</sub> (nmol.g<sup>-1</sup> FW). [B] Expression of *Ps-GLP1* and 2 in response to H<sub>2</sub>O<sub>2</sub> treatment. Fruit from early stage 2 (42 DAB) were treated with 1μM H<sub>2</sub>O<sub>2</sub> for 15 min. After that the fruits were dried and incubated at room temperature for 0, 1, 2, and 4 hrs post-treatment. The expression of both transcripts has been assessed by QRT-PCR. The experiments were carried out in triplicate. The x-axis represents the time of incubation after treatment (hours). Relative intensity in the y-axis refers to the fold difference in gene expression relative to the control (time zero).
